# Supplementary material
Source: PubMed Central journal article supplement (PMC6855403)

A

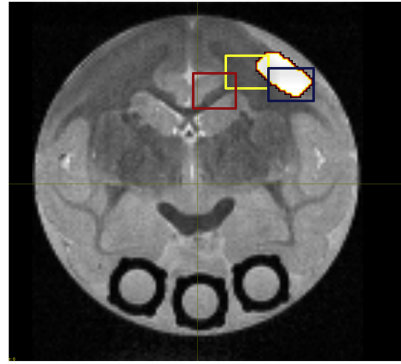

CSD

QBI

B&S

Single Fibers

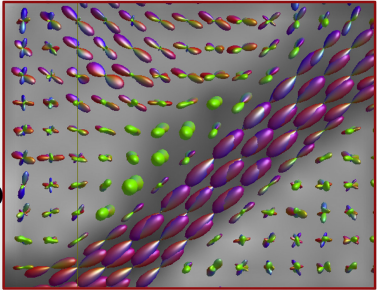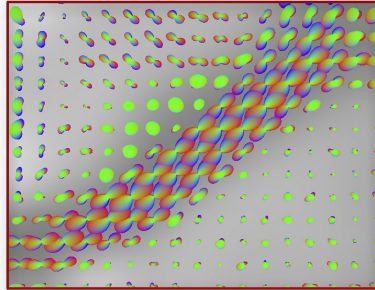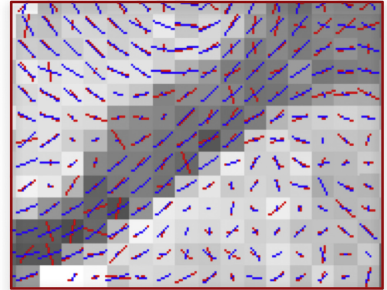

Crossing Fibers

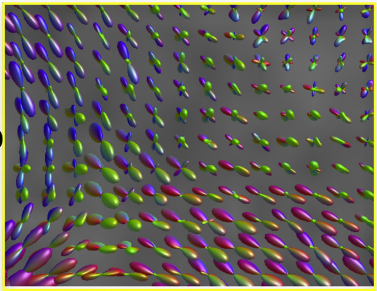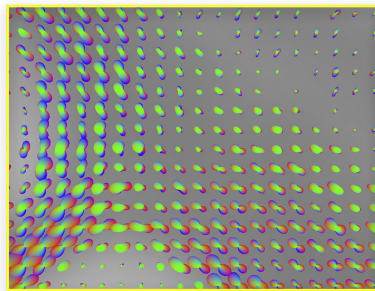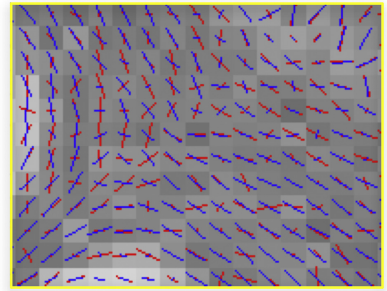

Gray Matter

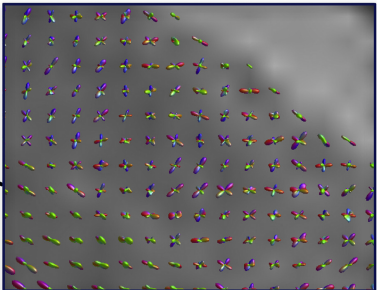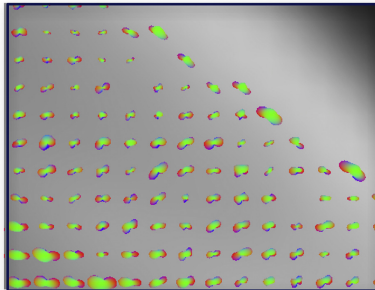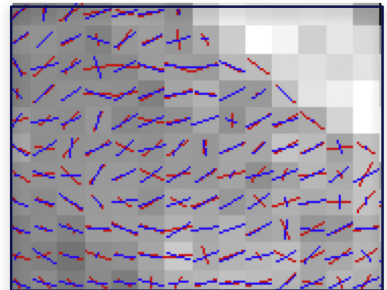

B

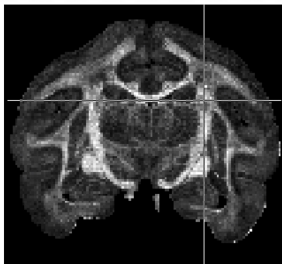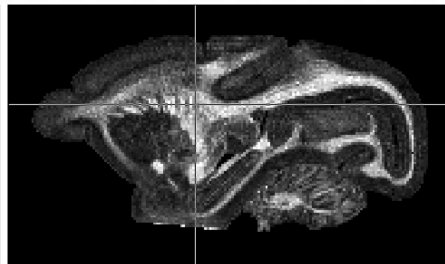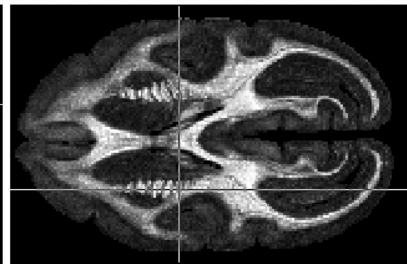

Supplement: NIHMS1042303-supplement-Fig__1.pdf [file NIHMS1042303-supplement-Fig__1.pdf]

## Voxel-based metrics

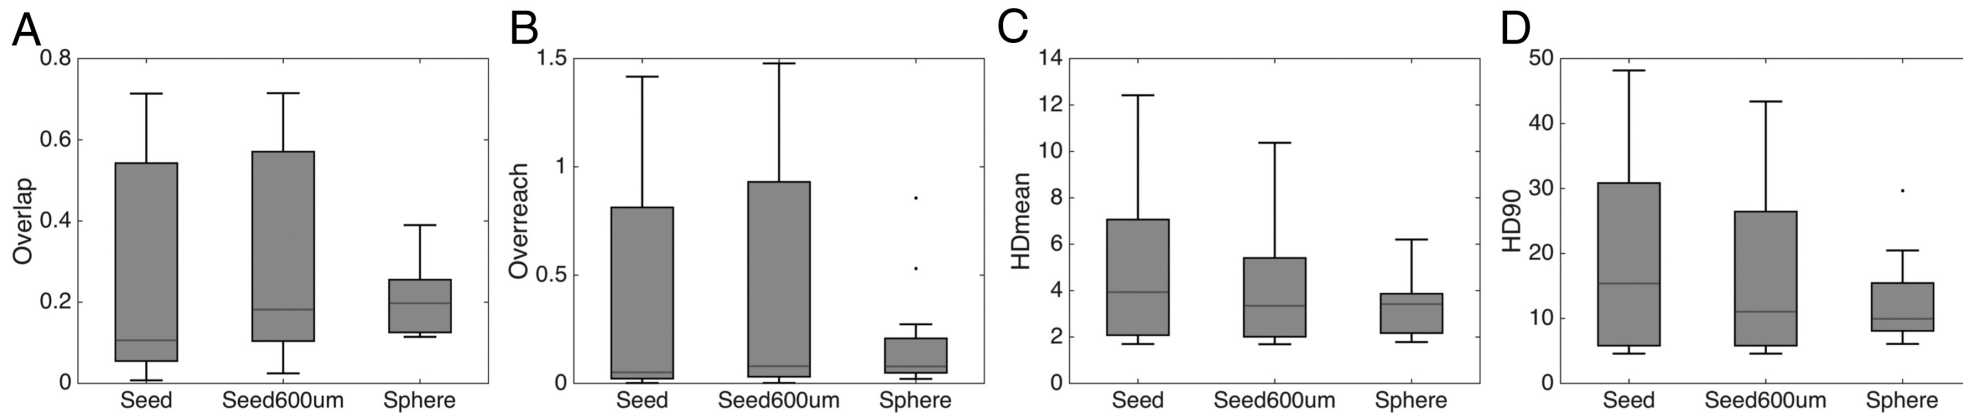

## ROI-based metrics

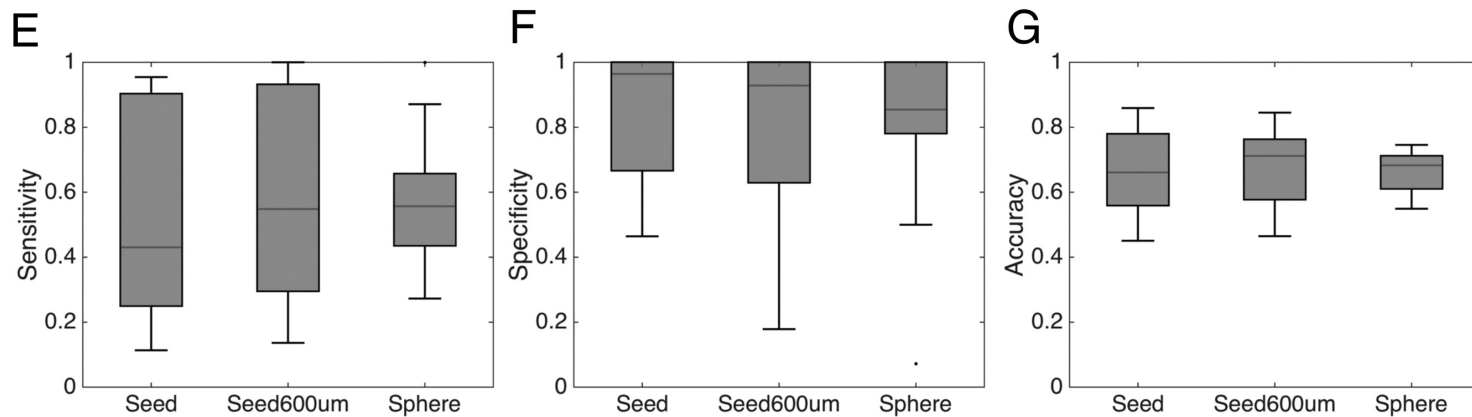

Supplement: NIHMS1042303-supplement-Fig__2.pdf [file NIHMS1042303-supplement-Fig__2.pdf]

## Voxel-based metrics

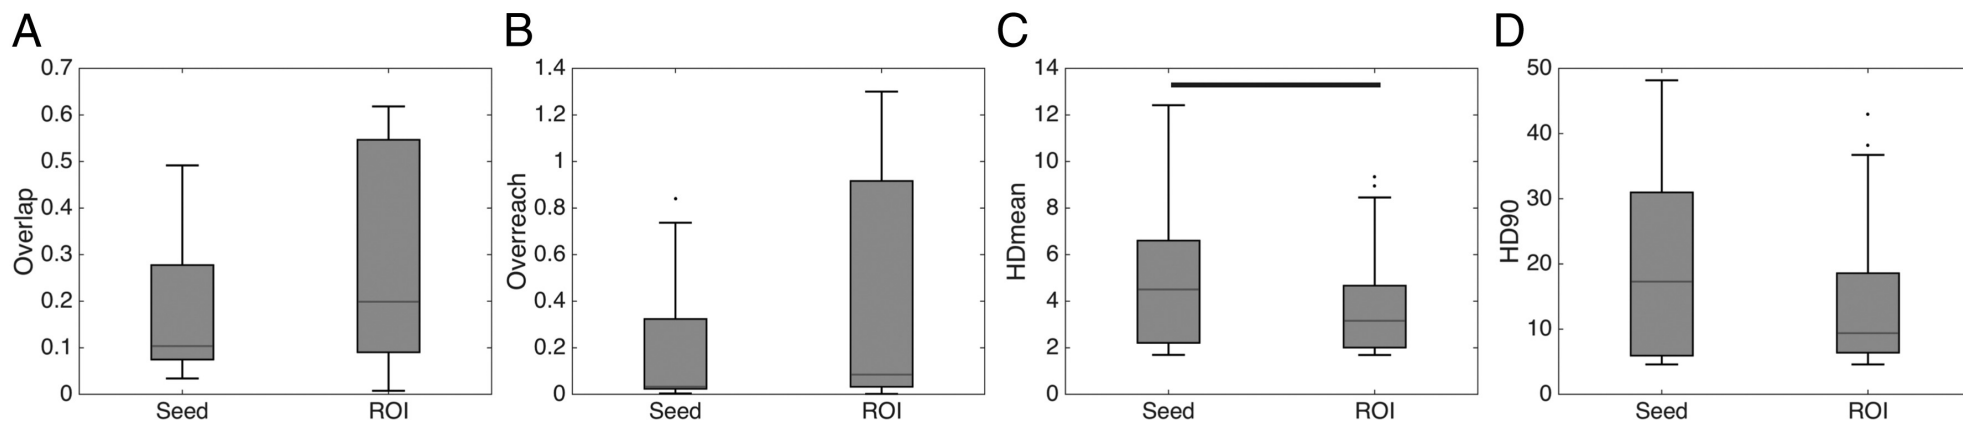

## ROI-based metrics

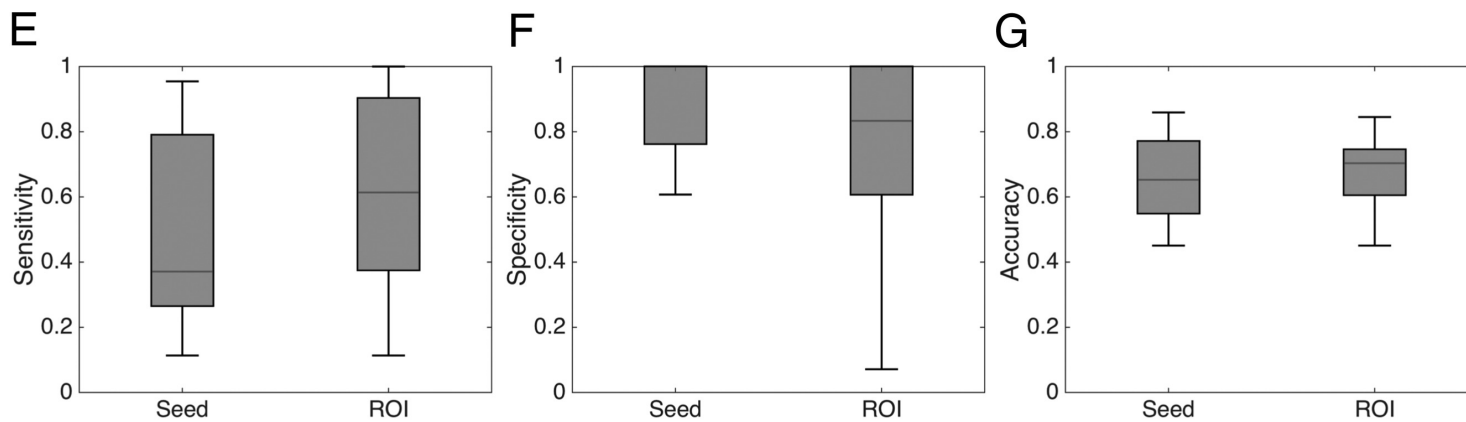

Supplement: NIHMS1042303-supplement-Fig__3.pdf [file NIHMS1042303-supplement-Fig__3.pdf]

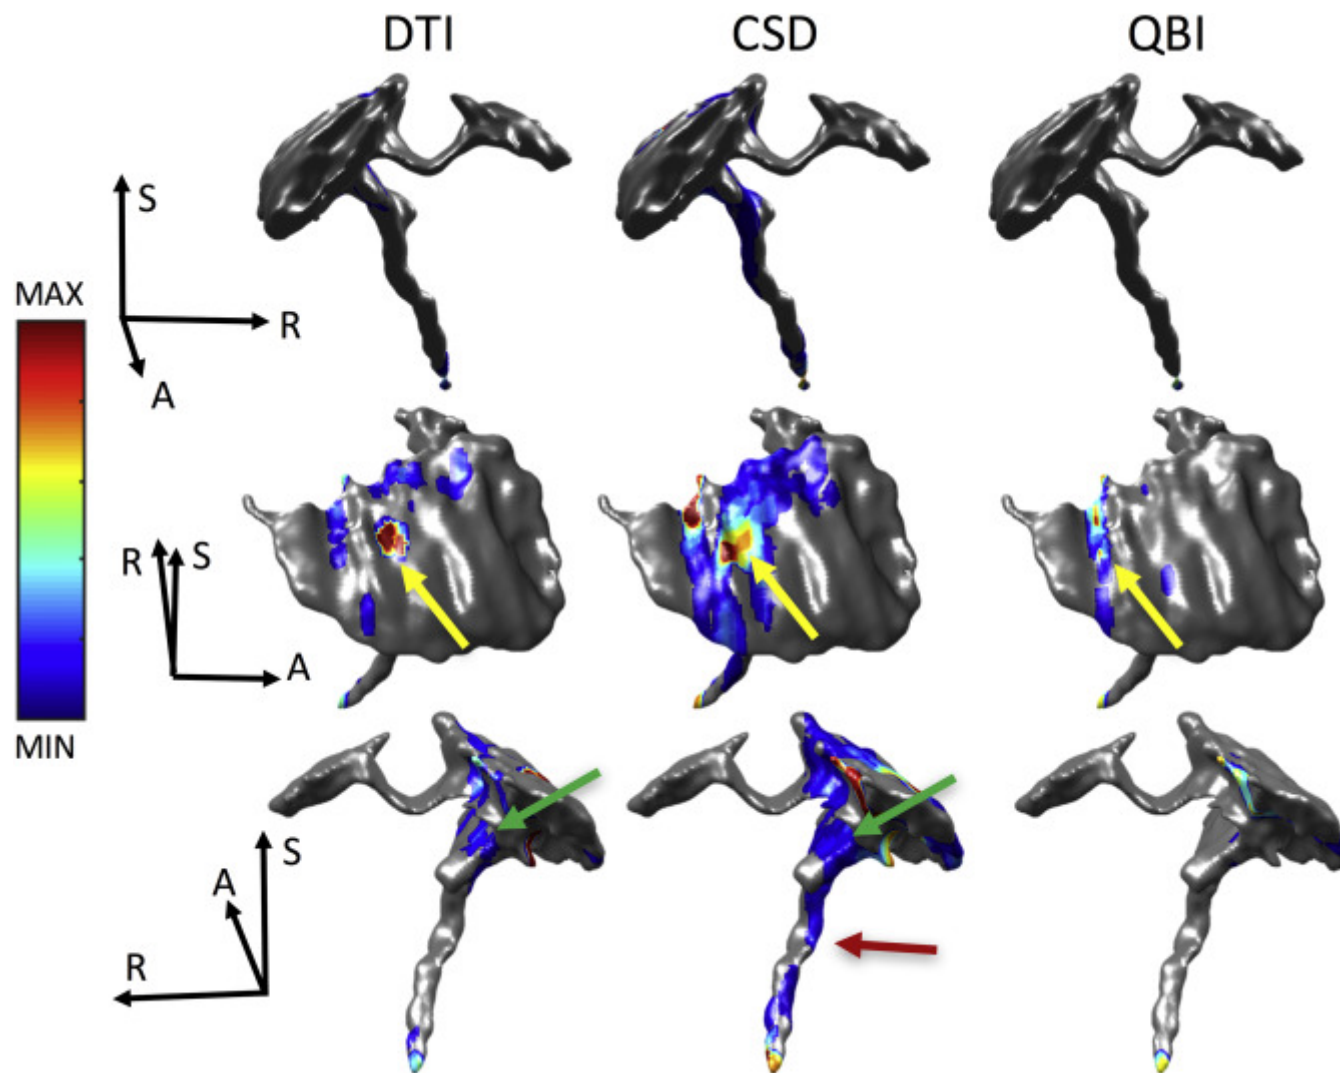

Supplement: NIHMS1042303-supplement-Fig__4.pdf [file NIHMS1042303-supplement-Fig__4.pdf]

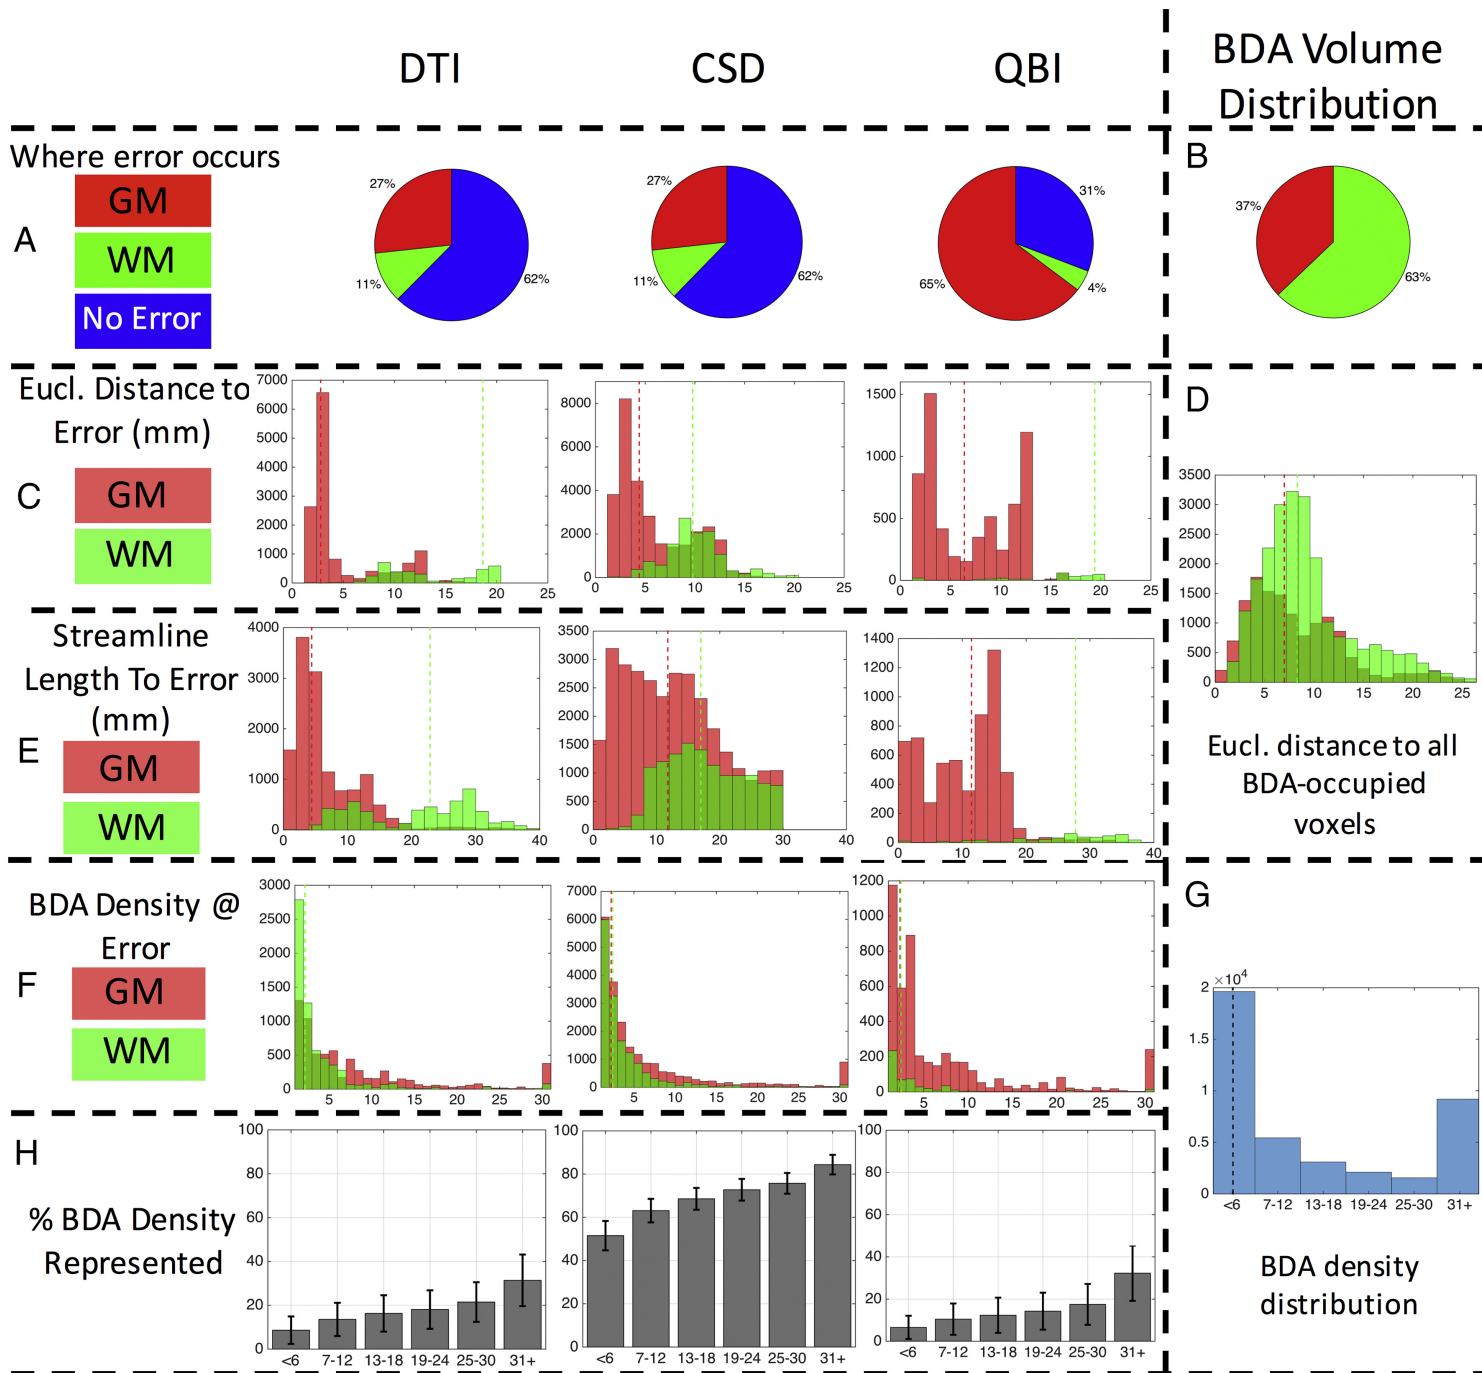

Supplement: NIHMS1042303-supplement-Fig__5.pdf [file NIHMS1042303-supplement-Fig__5.pdf]
